# Supplementary material
Source: PubMed Central journal article supplement (PMC4578580)

# Supplementary Material S4

- Quantification of ALK expression from RNA-seq data.
- FPKM; fragments per kilobase of transcript per million mapped reads. 95% confidence interval shown by error bars.
- Cases 1 and 2 demonstrate a markedly higher expression of the *ALK* gene than the other cases (case numbers are noted along the x axis).

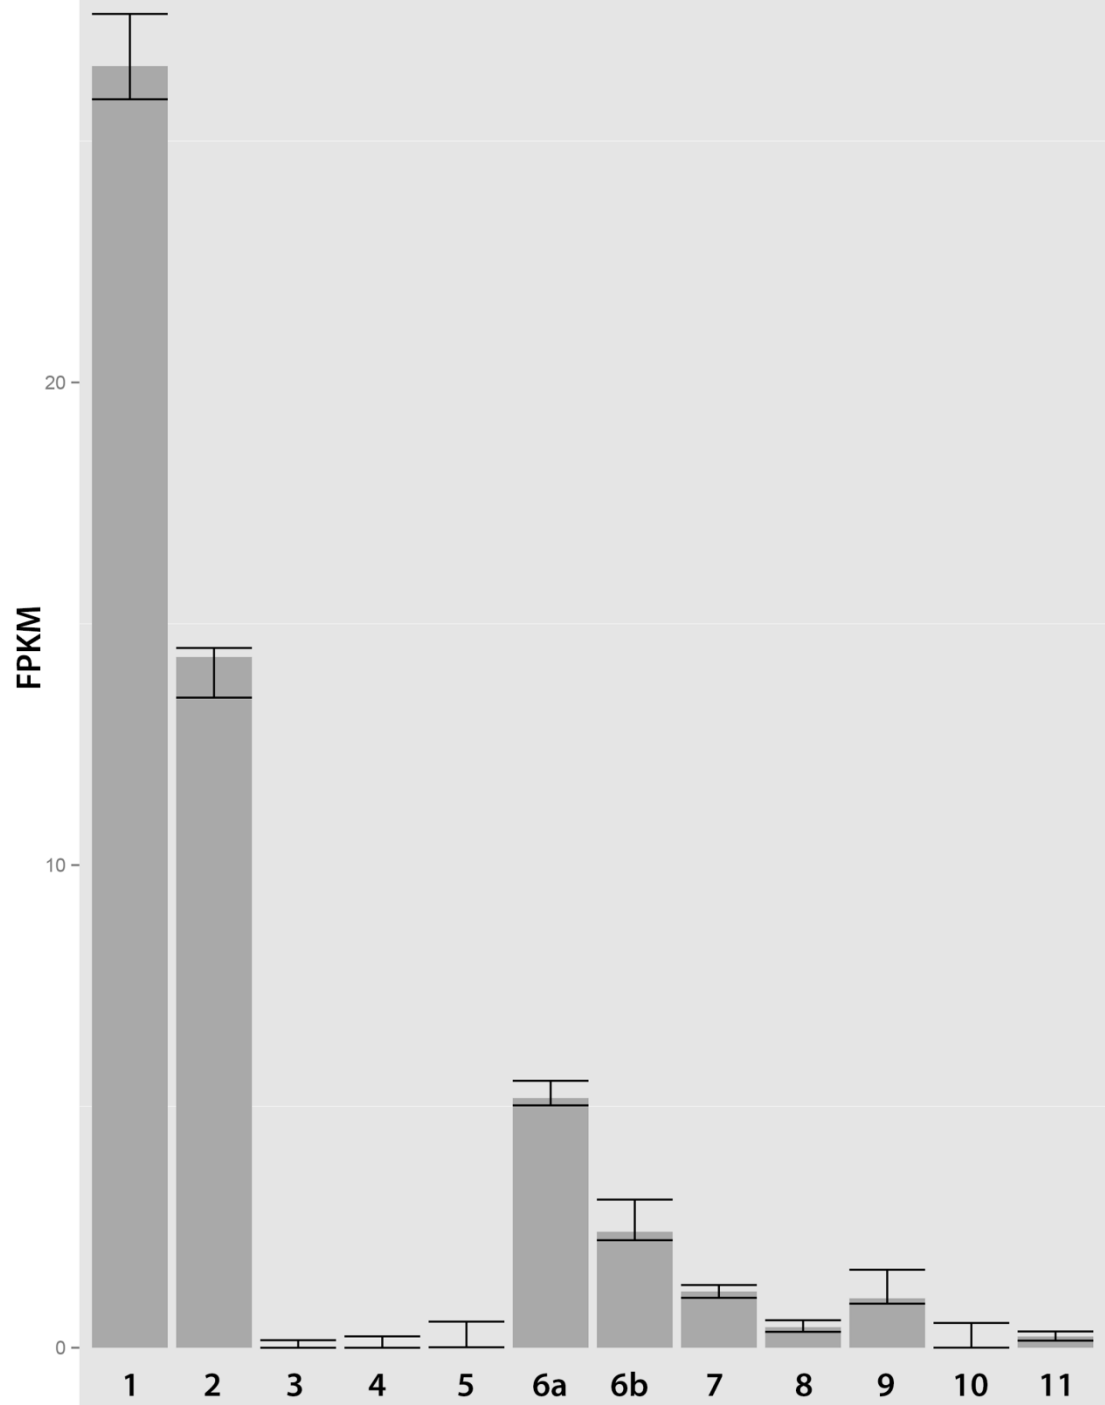

Supplement: supp_nov039_nov039supp_material4.pdf [file supp_nov039_nov039supp_material4.pdf]
