# Supplementary material
Source: PubMed Central journal article supplement (PMC4578580)

# Supplementary material S6

- ALK immunohistochemistry of an anaplastic astrocytoma (case G13 as described in Supplementary table S1)
- Scattered ALK staining of tumor cells, although not the uniformly strong and positive staining pattern seen in cases 1 and 2 (Figure 4)
- From Olsen et al: Fusion genes with *ALK* as recurrent partner in ependymoma-like gliomas: a new tumor entity?

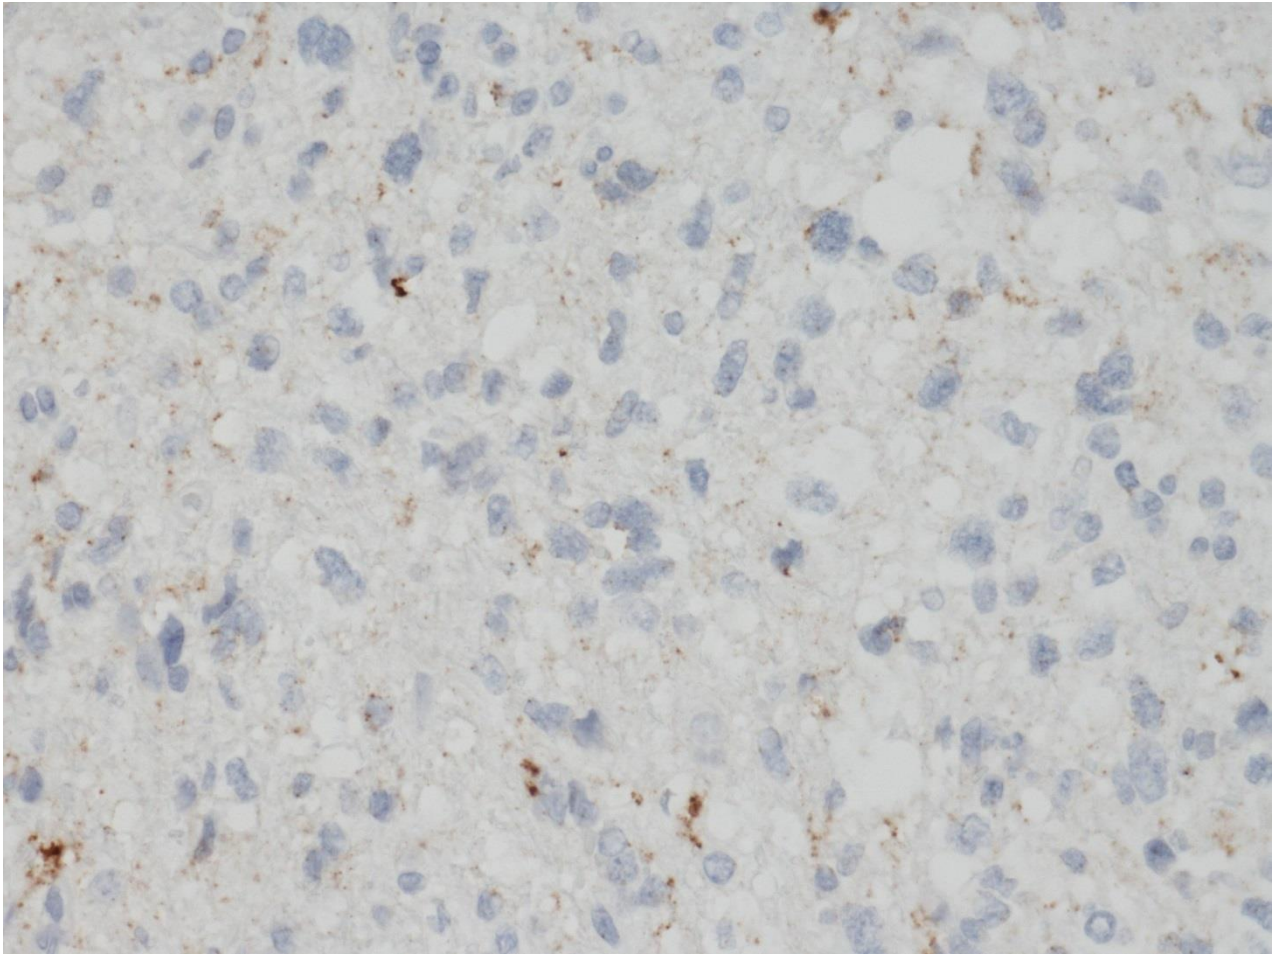

Supplement: supp_nov039_nov039supp_material6.pdf [file supp_nov039_nov039supp_material6.pdf]
