# Supplementary material
Source: PubMed Central journal article supplement (PMC4578580)
Supplement: supp_nov039_nov039supp_table1.pdf [file supp_nov039_nov039supp_table1.pdf]

**Supplementary Table S1.** FISH and immunohistochemistry results in 19 gliomas (grades I-IV) and 12 ependymomas. NA: not available; 0: negative; 1+: scattered staining pattern; 2+: strong and uniform staining pattern.

| Case no. | Sex | Age (years) | Histology                              | WHO grade | ALK FISH | pSTAT3 IHC | ALK IHC       | Olig2 IHC |
|----------|-----|-------------|----------------------------------------|-----------|----------|------------|---------------|-----------|
| G1       | M   | 15          | Pilocytic astrocytoma                  | I         | 0        | 2+         | 1+            | NA        |
| G2       | F   | 6           | Subependymal giant cell astrocytoma    | I         | 0        | NA         | NA            | NA        |
| G3       | M   | 12          | Pilocytic astrocytoma                  | I         | 0        | NA         | NA            | NA        |
| G4       | M   | 8           | Pilocytic astrocytoma                  | I         | 0        | 0          | 1+            | NA        |
| G5       | M   | 12          | Pilocytic astrocytoma                  | I         | 0        | 0          | 1+            | NA        |
| G6       | F   | 5           | Low-grade glioma                       | II        | 0        | NA         | NA            | NA        |
| G7       | F   | 8           | Low-grade astrocytoma                  | II        | NA       | 0          | 1+            | NA        |
| G8       | M   | 7           | Low-grade astrocytoma                  | II        | 0        | 0          | 0             | NA        |
| G9       | M   | 15          | Low-grade neuroepithelial tumor        | II        | 0        | NA         | NA            | NA        |
| G10      | M   | 30          | Low-grade astrocytoma                  | II        | 0        | 0          | 0             | NA        |
| G11      | F   | 27          | Anaplastic astrocytoma                 | III       | NA       | 1+         | 0             | NA        |
| G12      | M   | 28          | Anaplastic astrocytoma                 | III       | 0        | 1+         | 0             | NA        |
| G13      | M   | 29          | Anaplastic astrocytoma                 | III       | 0        | 0          | 1+            | NA        |
| G14      | M   | 29          | Anaplastic astrocytoma                 | III       | 0        | 0          | 0             | NA        |
| G15      | F   | 15          | Glioblastoma                           | IV        | 0        | NA         | NA            | NA        |
| G16      | M   | 20          | Glioblastoma                           | IV        | 0        | 0          | 0             | NA        |
| G17      | M   | 18          | Giant cell glioblastoma                | IV        | 0        | NA         | NA            | NA        |
| G18      | M   | 30          | Glioblastoma                           | IV        | 0        | 1+         | 0             | NA        |
| G19      | M   | 32          | Glioblastoma                           | IV        | 0        | 0          | 1+            | NA        |
| 1        | M   | 0.8         | Ependymoma                             | II or III | positive | 2+         | 2+ (positive) | 0         |
| 2        | F   | 0.9         | Anaplastic ependymoma/Glioblastoma     | IV        | positive | 2+         | 2+ (positive) | 0         |
| 3        | F   | 47          | Ependymoma                             | II        | NA       | NA         | NA            | NA        |
| 4        | M   | 53          | Ependymoma                             | II        | 0        | 1+         | 0             | NA        |
| 5        | M   | 61          | Subependymoma                          | I         | 0        | 0          | 0             | NA        |
| 6a       | M   | 38          | Anaplastic ependymoma, giant cell type | III       | 0        | 2+         | 0             | NA        |
| 6b       | M   | 38          | Anaplastic ependymoma                  | III       | NA       | NA         | NA            | NA        |
| 7        | M   | 75          | Subependymoma                          | I         | 0        | 1+         | 1+            | NA        |
| 8        | M   | 42          | Anaplastic ependymoma                  | III       | 0        | 1+         | 0             | NA        |
| 9        | F   | 46          | Subependymoma                          | I         | NA       | 0          | 0             | NA        |
| 10       | F   | 46          | Ependymoma                             | II        | 0        | 1+         | 0             | NA        |
| 11       | F   | 1           | Anaplastic ependymoma                  | III       | 0        | 1+         | 0             | NA        |
